# Supplementary material
Source: publisher site journal article supplement (https://www.dovepress.com/article/488877)
Supplement: Supplementary file 1 [file get_supplementary_file.php]

**Table S1** Clinical and physiological characteristics of study patients stratified by NMLR

| **Characteristic** | **NMLR＜5.90** | **NMLR≥5.90** | **P-value** |
| --- | --- | --- | --- |
| Number | 687 | 183 |  |
| Age (yr.) | 65.00 (58.00-71.00) | 67.00 (60.00-72.00) | .000 |
| Male (%) | 75.4 | 84.7 | .008 |
| Body mass index (kg/m2) | 23.75±4.04 | 23.322±3.48 | .232 |
| Smoking index (pack-yr.) | 20.00 (0.00-40.00) | 30.00 (0.00-45.00) |  |
| Smoking status |  |  |  |
| Never (%) | 39.7 | 31.7 |  |
| Former (%) | 27.8 | 37.2 |  |
| Current (%) | 32.5 | 31.1 |  |
| Comorbidity |  |  |  |
| Hypertension (%) | 28.5 | 33.3 | .206 |
| Diabetes (%) | 7.4 | 8.2 | .726 |
| Coronary heart disease (%) | 21.3 | 21.3 | .986 |
| Inhalation therapy |  |  |  |
| SABD (%) | 1.7 | 3.3 | .317 |
| ICS/LABA (%) | 25.2 | 21.3 | .278 |
| ICS/LABA+LAMA (%) | 28.2 | 30.6 | .530 |
| LAMA (%) | 20.8 | 24.0 | .345 |
| FEV1 (L) | 1.19 (0.85-1.62) | 1.05 (0.76-1.43) | .000 |
| FEV1 (%pred) | 48.30 (34.30-66.90) | 40.90 (29.80-55.90) | .000 |
| FVC (L) | 2.62±0.79 | 2.48±0.67 | .000 |
| FVC(%pred) | 79.90 (65.80-94.50) | 74.40 (63.10-85.50) | .000 |
| FEV1/FVC (%) | 48.40 (38.75-59.06) | 43.99 (35.82-55.20) | .000 |
| VA (L) | 4.91±1.11 | 4.86±0.96 | .562 |
| VA (%pred) | 87.01±14.78 | 84.55±14.18 | .044 |
| DLCO (mmol/min/kPa) | 6.05±2.39 | 5.51±2.12 | .005 |
| DLCO (%pred) | 76.67±27.54 | 70.50±26.97 | .005 |
| DLCO/VA (mmol/min/kPa/L) | 1.26±0.49 | 1.15±0.42 | .003 |
| pH | 7.43±0.03 | 7.42±0.04 | .793 |
| PaO2 (mmHg) | 71.50 (64.60-78.00) | 69.50 (60.80-76.70) | .003 |
| PaCO2 (mmHg) | 38.70 (35.40-42.00) | 39.56 (35.90-44.30) | .006 |
| PO2(A-a) (mmHg) | 27.10 (20.00-34.00) | 27.40 (19.60-36.40) | .066 |
| Leukocyte count (×109/L) | 6.09 (5.00-7.66) | 8.23 (6.65-11.12) | .413 |
| Neutrophil count (×109/L) | 3.83 (2.91-4.96) | 6.88 (5.34-9.40) | .043 |
| Monocyte count (×109/L) | 0.41 (0.29-0.55) | 0.38 (0.15-0.59) | .116 |
| Lymphocyte count (×109/L) | 1.62 (1.27-2.10) | 0.84 (0.64-1.05) | .000 |
| NMLR | 2.61 (1.92-3.67) | 8.07 (6.78-10.73) | .000 |
| NLR | 2.36 (1.70-3.35) | 7.81 (6.33-10.32) | .000 |
| MLR | 0.24 (0.17-0.33) | 0.41 (0.20-0.70) | .000 |
| Platelet count (×109/L) | 178.00 (139.00-223.00) | 187.00 (150.00-241.00) | .046 |
| Hemoglobin (g/L) | 136.32±17.21 | 136.01±16.84 | .893 |
| Albumin (g/L) | 39.50±3.98 | 39.15±4.48 | .344 |
| Globulin (g/L) | 24.72±4.51 | 25.68±4.31 | .007 |
| ALT (IU/L) | 17.00 (12.00-25.00) | 17.00 (12.00-27.00) | .020 |
| AST (IU/L) | 19.00 (16.00-25.00) | 19.00 (15.00-25.00) | .519 |
| DBIL (μmol/L) | 4.40 (3.18-6.00) | 4.10 (2.90-5.69) | .070 |
| IBIL (μmol/L) | 7.11 (4.96-9.82) | 6.04 (4.48-8.73) | .901 |
| Creatinine (μmol/L) | 68.33 (58.47-80.20) | 66.90 (57.33-79.33) | .554 |
| BUN (mmol/L) | 4.90 (4.01-6.03) | 5.54 (4.67-6.55) | .153 |
| Cystatin C (mg/L) | 1.00 (0.86-1.14) | 0.98 (0.85-1.13) | .016 |
| Mortality (%) | 12.4 | 27.3 | .000 |

**Notes:** Data are expressed as means ± standard deviation or median (interquartile range) or percentage

**Abbreviations:** SABD, short-acting bronchodilator; ICS, inhaled corticosteroids; LABA, long-acting beta-2 agonist; LAMA, long-acting muscarinic antagonists; FEV1, forced expiratory volume in 1s; FVC, forced vital capacity; VA, alveolar ventilation; DLCO, diffusing lung capacity for carbon monoxide; PaO2, partial pressure of oxygen in arterial blood; PaCO2, partial pressure of carbon dioxide in arterial blood; PO2(A-a), alveolar-arterial oxygen gradient; NLR, neutrophil to lymphocyte ratio; MLR, monocyte to lymphocyte ratio; NMLR, (neutrophil + monocyte)/ lymphocyte ratio; ALT, alanine aminotransferase; AST, aspartate aminotransferase; DBIL, direct bilirubin; IBIL, indirect bilirubin; BUN, blood urea nitrogen.
